# Supplementary material
Source: publisher figshare collection journal article supplement (https://acs.figshare.com/ndownloader/files/10969847)
Supplement: Supplementary file 1 [file 10969847]

Electronic Supplementary Information (ESI) for

**Metal-free mesoporous SiO<sub>2</sub> nanorods as a highly efficient catalyst  
for the Baeyer–Villiger oxidation under mild conditions**

Xueyao Zhang, Honglei Yang, Guangxue Yang, Shuwen Li, Xiang Wang  
and Jiantai Ma\*

*State Key Laboratory of Applied Organic Chemistry (SKLAOC), Gansu  
Provincial Engineering Laboratory for Chemical Catalysis, College of  
Chemistry and Chemical Engineering, Lanzhou University, Tianshui  
South Road 222, Lanzhou 730000, PR China.*

*E-mail: [majiantai@lzu.edu.cn](mailto:majiantai@lzu.edu.cn); Fax: +86-931-8912582; Tel:  
+86-931-8912577*

Number of pages: 12

Number of tables: 4

Number of figures: 3

## Experimental Section

### Materials

Hexadecyl trimethyl Ammonium Bromide (CTAB), ammonia ( $\text{NH}_3 \cdot \text{H}_2\text{O}$ ) were purchased from Tianjin Guangfu Fine Chemical Research Institute. TEMPO and PBN were purchased from J&K Chemical Co. Ltd. Cyclohexanone, Benzaldehyde and 1,2-Dichloroethane were purchased from Tianjin Kaixin Chemical Co. Ltd. Tetraethoxysilane (TEOS) ethanol and other solvents, which were analytical grade and used without further purification, were obtained from Tianjinshi Baishi Chemical Co. Ltd. Deionized water was used throughout the experiments.

### Synthesis of $\text{mSiO}_2$ rods

Mesoporous  $\text{SiO}_2$  rods was prepared through the method given in previous reports.  $\text{H}_2\text{O}$ , EtOH and  $\text{NH}_3 \cdot \text{H}_2\text{O}$  were mixed, and then CTAB was dissolved in above solution. After stirring for 15 minutes, TEOS was added dropwise to the solution along with the clear solution turning opaque quickly. The solution was magnetically stirred for 2 h and the white precipitate was collected by filtration, washing with large amount of deionized water. The white powders were dried in air at  $60\text{ }^\circ\text{C}$ . The templates were removed by calcining the products at  $550\text{ }^\circ\text{C}$  for 10 h; thus the mesoporous silica material was obtained. The molar ratios of reactants in the resulted material were 1 TEOS: x  $\text{H}_2\text{O}$ : 20 EtOH: 10.3

$\text{NH}_3 \cdot \text{H}_2\text{O}$ : 0.3 CTAB. x ranged from 248 to 1486.

#### Characterization of the catalyst $\text{mSiO}_2$ rods

The synthesized catalyst was confirmed by corresponding characterization means.

Powder X-ray diffraction (XRD) patterns were carried out at room temperature and performed on a Rigaku D/max-2400 diffractometer using Cu-K $\alpha$  radiation as the X-ray source in the  $2\theta$  range of 0.5-4 for small angle. Fourier transform infrared (FT-IR) spectra were recorded on a Nicolet NEXUS 670 FTIR spectrometer with a DTGS detector, and samples were measured with KBr pellets. FT-IR spectra of pyridine adsorption were carried out on a Nicolet Nexus 670 FT-IR spectrometer with a spectral resolution of 4  $\text{cm}^{-1}$  in absorbance mode. The pyridine adsorption was realized by exposing the wafer to the corresponding vapors at room temperature for 1 h after the specimen was dehydrated at 723 K for 2 h to remove any water in the material. The FT-IR spectra of adsorbed pyridine were collected for 1 h as the desorption temperature was increased from 323 to 473 K. The morphology and microstructure of  $\text{mSiO}_2$  rods were characterized by scanning electron microscopy (SEM) and transmission electron microscopy (TEM). SEM images was recorded on a Hitachi S-4800 (Chiyoda-ku, Tokyo, Japan) operated under high vacuum with an accelerating voltage of 7 kV. The TEM images were

obtained through Tecnai G2 F30 electron microscope operating at 300 kV, and the samples were obtained by placing a drop of a colloidal solution onto a copper grid and evaporating the solvent in air at room temperature. N<sub>2</sub> physical sorption was carried out on micromeritics ASAP2020 volumetric adsorption analyzer (before the measurements, samples were out gassed at 200 °C for 6 h). The Brunauer–Emmett–Teller (BET) surface area was evaluated from data in the relative pressure range from 0.05 to 1.0. The total pore volume of each sample was estimated from the amount adsorbed at the highest P/P<sub>0</sub> (above 0.99). Pore diameters were determined from the adsorption branch using Barrett–Joyner–Halenda (BJH) method and Density Functional Theory (DFT) method. The conversion was estimated by GC-MS (Agilent 6,890N/5,973N). EPR spectra were obtained by Bruker A300 electron paramagnetic resonance spectroscopy.

**Table S1 Optimization conditions of the B-V reaction with EtOAc**

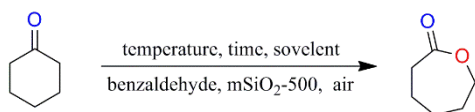

| Entry | Amount of catalyst (mg) | Temperature (°C) | Time (h) | solvent | Yield <sup>a</sup> (Sel.) (%) |
|-------|-------------------------|------------------|----------|---------|-------------------------------|
| 1     | 10                      | 50               | 5        | EtOAc   | 72 (>99)                      |
| 2     | 15                      | 50               | 5        | EtOAc   | 77 (>99)                      |
| 3     | 20                      | 50               | 5        | EtOAc   | 92 (>99)                      |
| 4     | 25                      | 50               | 5        | EtOAc   | 82 (>99)                      |
| 5     | 30                      | 50               | 5        | EtOAc   | 79 (>99)                      |
| 6     | 35                      | 50               | 5        | EtOAc   | 75 (>99)                      |
| 7     | 40                      | 50               | 5        | EtOAc   | 67 (>99)                      |
| 8     | 25                      | 20               | 5        | EtOAc   | 54 (>99)                      |
| 9     | 25                      | 30               | 5        | EtOAc   | 61 (>99)                      |
| 10    | 25                      | 40               | 5        | EtOAc   | 74 (>99)                      |
| 11    | 25                      | 60               | 5        | EtOAc   | 72 (>99)                      |
| 12    | 20                      | 50               | 1        | EtOAc   | 40 (>99)                      |
| 13    | 20                      | 50               | 2        | EtOAc   | 53 (>99)                      |
| 14    | 20                      | 50               | 3        | EtOAc   | 72 (>99)                      |
| 15    | 20                      | 50               | 4        | EtOAc   | 86 (>99)                      |
| 17    | 20                      | 50               | 6        | EtOAc   | 91 (>99)                      |

<sup>a</sup> The yield and selectivity were determined by GC–MS based on the internal standard method (dodecane)

**Table S2 The source of oxygen for the B-V oxidation reaction <sup>a</sup>**

| Entry          | The source of oxygen          | Yield <sup>b</sup> (Sel.) (%) |
|----------------|-------------------------------|-------------------------------|
| 1              | O <sub>2</sub> balloon        | >99 (>99)                     |
| 2              | Open air                      | 74 (>99)                      |
| 3              | Pumping air                   | >99 (>99)                     |
| 4              | N <sub>2</sub> balloon        | — (—)                         |
| 5 <sup>c</sup> | H <sub>2</sub> O <sub>2</sub> | 9% (26%)                      |

<sup>a</sup> Reaction conditions: cyclohexanone (2mmol), benzaldehyde (2.0 equiv.), dodecane (1 mmol), mSiO<sub>2</sub>-500 25 mg, in DCE (5mL), 50 °C, 5 h

<sup>b</sup> The yield and selectivity were determined by GC–MS based on the internal standard method (dodecane) <sup>c</sup> Reaction conditions: cyclohexanone (2mmol), H<sub>2</sub>O<sub>2</sub> (12 mmol (approx.)), 25 mg mSiO<sub>2</sub> nanorods, 50 °C for 5 h under argon atmosphere.

**Table S3. The B-V oxidation reaction of various aldehydes <sup>a</sup>**

| Entry | aldehyde                      | Amount of aldehyde | Yield of $\epsilon$ -Caprolactone <sup>b</sup><br>(Sel.) (%) |
|-------|-------------------------------|--------------------|--------------------------------------------------------------|
| 1     | benzaldehyde                  | 1 equiv            | 61 (>99)                                                     |
| 2     | benzaldehyde                  | 1.5 equiv          | 94 (>99)                                                     |
| 3     | benzaldehyde                  | 2 equiv            | >99 (>99)                                                    |
| 4     | benzaldehyde                  | 2.5 equiv          | >99 (>99)                                                    |
| 5     | benzaldehyde                  | 3 equiv            | >99 (>99)                                                    |
| 6     | Formaldehyde solution         | 2 equiv            | trace                                                        |
| 7     | Paraformaldehyde <sup>c</sup> | 2 equiv            | trace                                                        |
| 8     | glyoxal                       | 2 equiv            | trace                                                        |
| 9     | chloroacetaldehyde            | 2 equiv            | trace                                                        |
| 10    | propenal                      | 2 equiv            | trace                                                        |
| 11    | propionaldehyde               | 2 equiv            | trace                                                        |
| 12    | n-butanal                     | 2 equiv            | 21 (>99)                                                     |
| 13    | n-heptanal                    | 2 equiv            | 45 (>99)                                                     |
| 14    | p-phthalaldehyde              | 2 equiv            | 60 (>99)                                                     |
| 15    | p-nitrobenzaldehyde           | 2 equiv            | 57 (>99)                                                     |
| 16    | p-bromobenzaldehyde           | 2 equiv            | 81 (>99)                                                     |
| 17    | p-chlorobenzaldehyde          | 2 equiv            | 86 (>99)                                                     |

<sup>a</sup> Reaction conditions: cyclohexanone (2mmol), mSiO<sub>2</sub>-500 25 mg, in

---

DCE (5mL), 50°C, 5 h, pumping air <sup>b</sup> The yield and selectivity were determined by GC–MS <sup>c</sup> the reaction temperature was 120°C



**Table S4 Oxidation of Cyclohexanone by m-Chloroperoxybenzoic Acid<sup>a</sup>**

| catalyst                   | Conversion (%) | Yield (%) | Selectivity (%) |
|----------------------------|----------------|-----------|-----------------|
| mSiO <sub>2</sub> nanorods | 99             | 99        | >99             |
| no catalyst                | 93             | 93        | >99             |

<sup>a</sup> reaction conditions: cyclohexanone, 1.0 mmol, m-CPBA, 1.0 mmol, mSiO<sub>2</sub> nanorods 12 mg; 1,2-dichloroethane, 5 mL; O<sub>2</sub>; 50 °C.

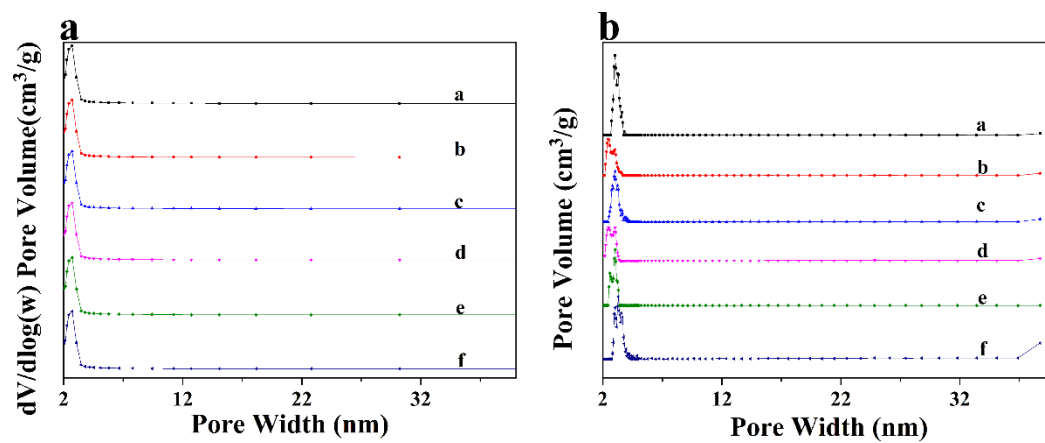

Fig. S1 The pore size distribution of mSiO<sub>2</sub> nanoparticles measured by (a) BJH method and (b) DFT method

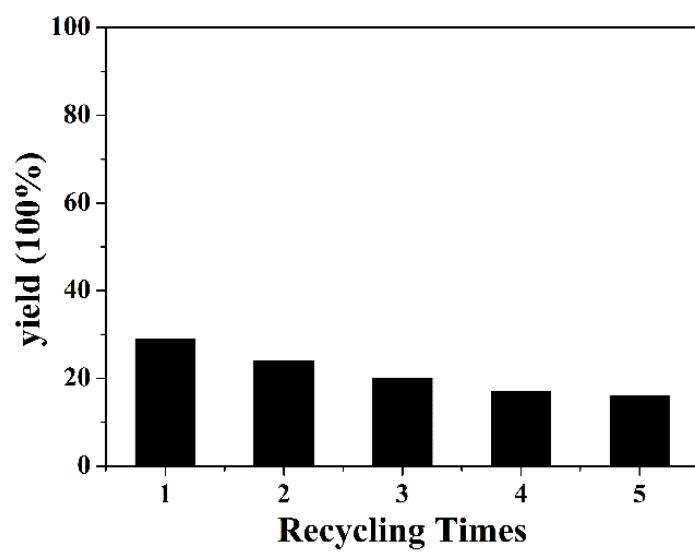

Fig. S2 Recycling experiments of the mSiO<sub>2</sub> nanorods catalyst

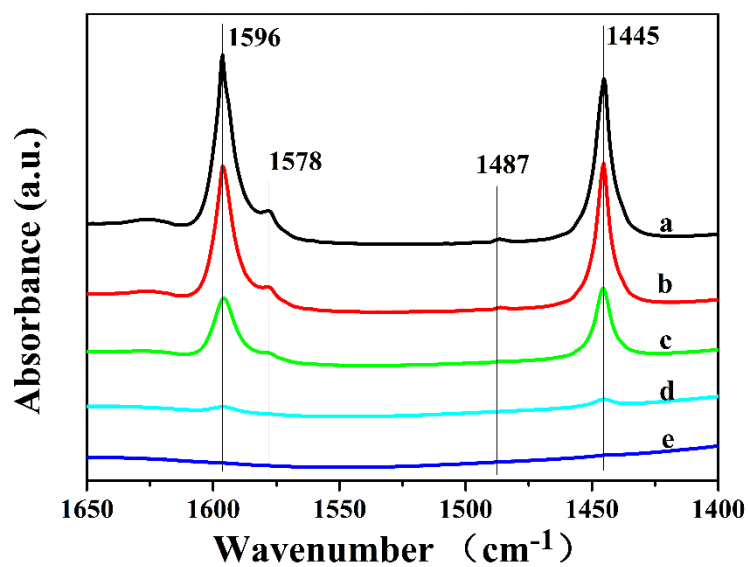

Fig. S3 FT-IR spectra of mSiO<sub>2</sub> nanorods after pyridine adsorption at room temperature for 1 h and desorption at (a) 50 °C (b), 85 °C (c) 100 °C (d) 150 °C and (e) 200 °C for 1 h, respectively.
